# Supplementary material for: Phase diagram, stability and electronic properties of an Fe–P system under high pressure: a first principles study
Source: Royal Society of Chemistry journal article supplement (doi:10.1039/c7ra01567d), 2017-01-01
Supplement: c7ra01567d1.pdf [file c7ra01567d1.pdf]

## Supporting Information

### Phase Diagram, Stability and Electronic Property of Fe-P

#### System under High Pressure: a First-Principles study

Ziyuan Zhao<sup>a</sup>, Lulu Liu<sup>a</sup>, Shoutao Zhang<sup>a</sup>, Tong Yu<sup>a</sup>, Fei Li<sup>a</sup> and Guochun Yang<sup>a,b,\*</sup>

*a. Centre for Advanced Optoelectronic Functional Materials Research and Key Laboratory for UV Light-Emitting Materials and Technology of Ministry of Education, Northeast Normal University, Changchun 130024, China*

*b. State Key Laboratory of Superhard Materials, Jilin University, Changchun 130012, China*

Email address: yanggc468@nenu.edu.cn

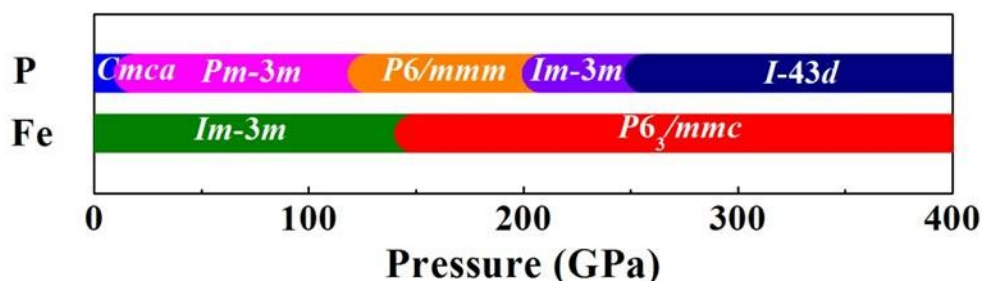

**Figure S1.** Pressure phase diagram of the elementary substances of Fe and P. The *bcc* phase (*Im-3m*) of element Fe is stable at ambient pressure until 149 GPa and the *hcp* structure (*P6<sub>3</sub>/mmc*) is more stable at high pressure. For element P, the phase of space group *Cmca*, *Pm-3m*, *P6/mmm*, *Im-3m*, and *I-43d* are presented in range of 0 - 18 GPa, 18 - 127 GPa, 127 - 208 GPa, 208 - 256 GPa, and 256 - 400 GPa, respectively.

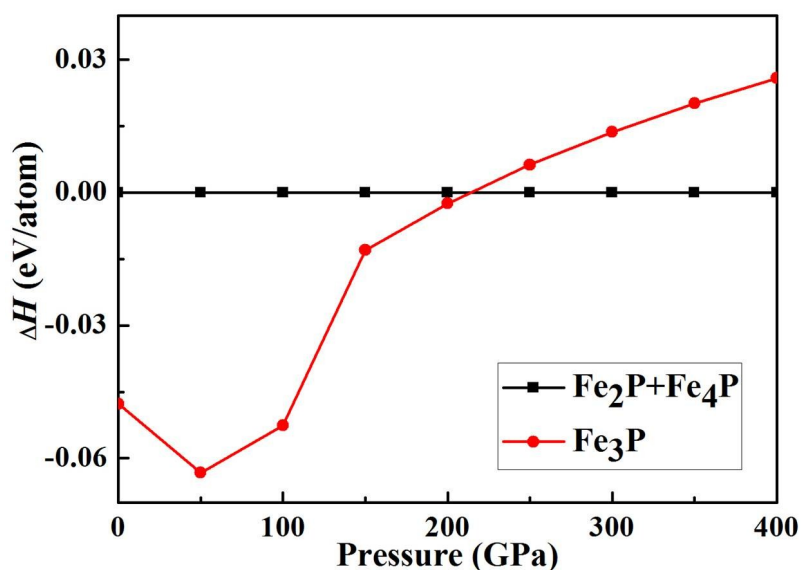

**Figure S2.** The calculated enthalpy difference as a function of pressure, for the reaction

equation:  $2\text{Fe}_3\text{P} \leftrightarrow \text{Fe}_2\text{P} + \text{Fe}_4\text{P}$ .  $I\bar{4}$  and  $Cmcm$  referred to the symmetry of the  $\text{Fe}_3\text{P}$  phase,  $P\bar{6}2m$  and  $Pnma$  referred to the symmetry of the  $\text{Fe}_2\text{P}$  phase, and  $P2_13$  and  $C2/c$  referred to the symmetry of the  $\text{Fe}_4\text{P}$ . This indicates that  $\text{Fe}_3\text{P}$  compound decomposes into  $\text{Fe}_2\text{P}$  and  $\text{Fe}_4\text{P}$  above 214 GPa.

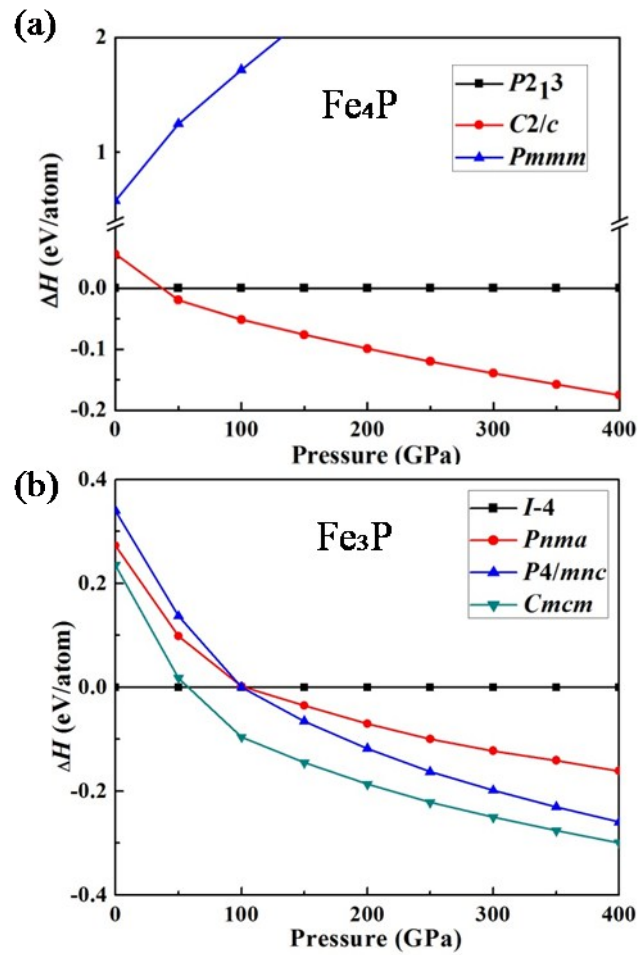

**Figure S3.** Enthalpy differences of Fe-P compounds as a function of pressure. (a)  $\text{Fe}_4\text{P}$  phase. (b)  $\text{Fe}_3\text{P}$  phase.

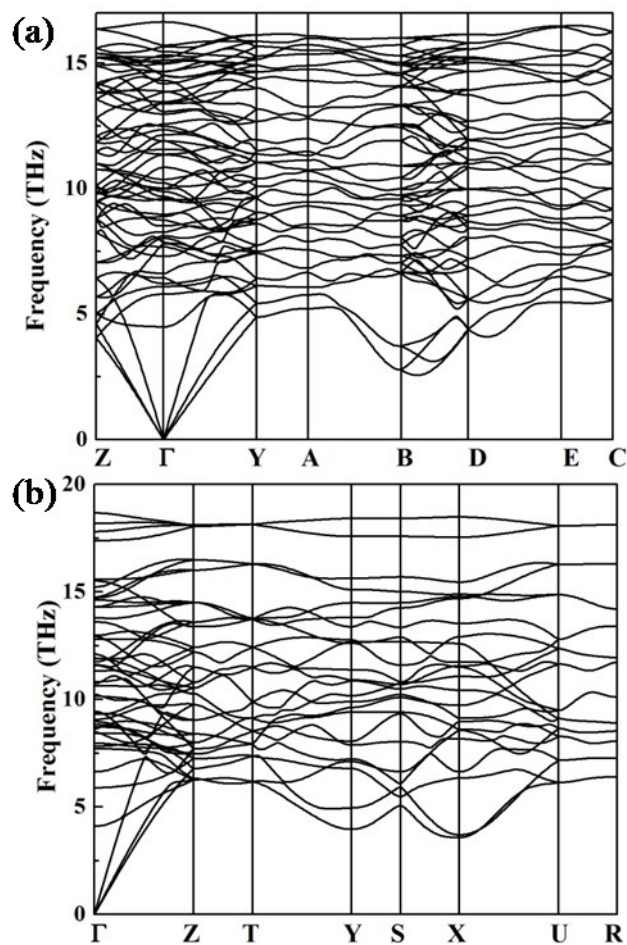

**Figure S4.** Calculated phonon spectra for Fe-P compounds at the respective stable pressure range. (a) The  $C2/c$ -structure  $Fe_4P$  at 100 GPa. (b) The  $Cmcm$ -structure  $Fe_3P$  at 100 GPa.

**Table S1.** Calculated integrated crystal orbital Hamiltonian populations (ICOHPs) of Fe-Fe, and Fe-P pairs in  $Fe_4P$ .

| Phase            | Pressure<br>(GPa) | Atom       | Atom       | Distance<br>(Å) | ICOHP( $E_f$ )  |
|------------------|-------------------|------------|------------|-----------------|-----------------|
| $Fe_4P$ - $C2/c$ | 200               | <b>Fe1</b> | <b>P10</b> | <b>2.18037</b>  | <b>-1.79724</b> |
|                  |                   | Fe 4s      | P 3s       | 2.18037         | 0.06782         |
|                  |                   | Fe 4s      | P 3p       | 2.18037         | 0.00166         |
|                  |                   | Fe 3p      | P 3s       | 2.18037         | -0.13780        |
|                  |                   | Fe 3p      | P 3p       | 2.18037         | -0.45490        |
|                  |                   | Fe 3d      | P 3s       | 2.18037         | -0.19935        |
|                  |                   | Fe 3d      | P 3p       | 2.18037         | -1.07467        |

|            |            |                |                 |
|------------|------------|----------------|-----------------|
| <b>Fe5</b> | <b>Fe8</b> | <b>2.17814</b> | <b>-4.97046</b> |
| Fe 4s      | Fe 4s      | 2.17814        | 0.22743         |
| Fe 4s      | Fe 3p      | 2.17814        | -0.54495        |
| Fe 4s      | Fe 3d      | 2.17814        | -1.57096        |
| Fe 3p      | Fe 4s      | 2.17814        | -0.11569        |
| Fe 3p      | Fe 3p      | 2.17814        | -0.20230        |
| Fe 3p      | Fe 3d      | 2.17814        | -0.70508        |
| Fe 3d      | Fe 4s      | 2.17814        | -0.33689        |
| Fe 3d      | Fe 3p      | 2.17814        | -0.84201        |
| Fe 3d      | Fe 3d      | 2.17814        | -0.88004        |

**Table S2.** The  $\Delta H$  values of the three Fe<sub>3</sub>P phases (space group *Cmcm*, *P4/mnc* and *Pnma*) at 64 GPa.

| <b>Phase</b>                     | <b>Enthalpy<br/>(eV/atom)</b> |
|----------------------------------|-------------------------------|
| Fe <sub>3</sub> P- <i>Cmcm</i>   | 0.00                          |
| Fe <sub>3</sub> P- <i>P4/mnc</i> | 0.113                         |
| Fe <sub>3</sub> P- <i>Pnma</i>   | 0.087                         |
